# Supplementary material
Source: MDPI journal article supplement (https://www.mdpi.com/1424-8247/15/2/141)
Supplement: s1 [file s1]

# Evaluation of Bioactive Properties of Lipophilic Fractions of Edible and non-Edible Parts of *Nasturtium officinale* (watercress) in a Model of Human Malignant Melanoma Cells

Sotiris Kyriakou<sup>1,2</sup>, Venetia Tragkola<sup>1,2</sup>, Heba Alghol<sup>2</sup>, Ioannis Anestopoulos<sup>1,2</sup>, Tom Amery<sup>3</sup>, Kyle Stewart<sup>4</sup>, Paul G. Winyard<sup>4</sup>, Dimitrios T. Trafalis<sup>5</sup>, Rodrigo Franco<sup>6,7</sup>, Aglaia Pappa<sup>8</sup>, Mihalis I. Panayiotidis<sup>1,2\*</sup>

<sup>1</sup> Department of Cancer Genetics, Therapeutics & Ultrastructural Pathology, The Cyprus Institute of Neurology & Genetics, Nicosia, 2371, Cyprus; [sotirisk@cing.ac.cy](mailto:sotirisk@cing.ac.cy), [venetiat@cing.ac.cy](mailto:venetiat@cing.ac.cy), [ioannisa@cing.ac.cy](mailto:ioannisa@cing.ac.cy), [mihalisp@cing.ac.cy](mailto:mihalisp@cing.ac.cy)

<sup>2</sup> The Cyprus School of Molecular Medicine, Nicosia, 1683, Cyprus; [sotirisk@cing.ac.cy](mailto:sotirisk@cing.ac.cy), [algholh@cing.ac.cy](mailto:algholh@cing.ac.cy), [venetiat@cing.ac.cy](mailto:venetiat@cing.ac.cy), [ioannisa@cing.ac.cy](mailto:ioannisa@cing.ac.cy), [mihalisp@cing.ac.cy](mailto:mihalisp@cing.ac.cy)

<sup>3</sup> TheWatercress Company, Dorchester, DT2 8QY, UK; [tom.amery@thewatercresscompany.com](mailto:tom.amery@thewatercresscompany.com);

<sup>4</sup> Watercress Research Limited, Devon, TQ12 4AA, UK; [kyle@watercress-research.com](mailto:kyle@watercress-research.com); [paul@watercress-research.com](mailto:paul@watercress-research.com)

<sup>5</sup> Laboratory of Pharmacology, Medical School, National & Kapodistrian University of Athens, Athens, 11527, Greece; [dtrafal@med.uoa.gr](mailto:dtrafal@med.uoa.gr)

<sup>6</sup> Redox Biology Centre, University of Nebraska-Lincoln, Lincoln, NE 68583, USA; [rodrigo.franco@unl.edu](mailto:rodrigo.franco@unl.edu)

<sup>7</sup> Department of Veterinary Medicine & Biomedical Sciences, University of Nebraska-Lincoln, Lincoln, NE 68583, USA; [rodrigo.franco@unl.edu](mailto:rodrigo.franco@unl.edu)

<sup>8</sup> Department of Molecular Biology & Genetics, Democritus University of Thrace, Alexandroupolis, 68100, Greece; [apappa@mbg.duth.gr](mailto:apappa@mbg.duth.gr)

\* Correspondence: [mihalisp@cing.ac.cy](mailto:mihalisp@cing.ac.cy); Tel.: +357-22392626

## Supplementary Material

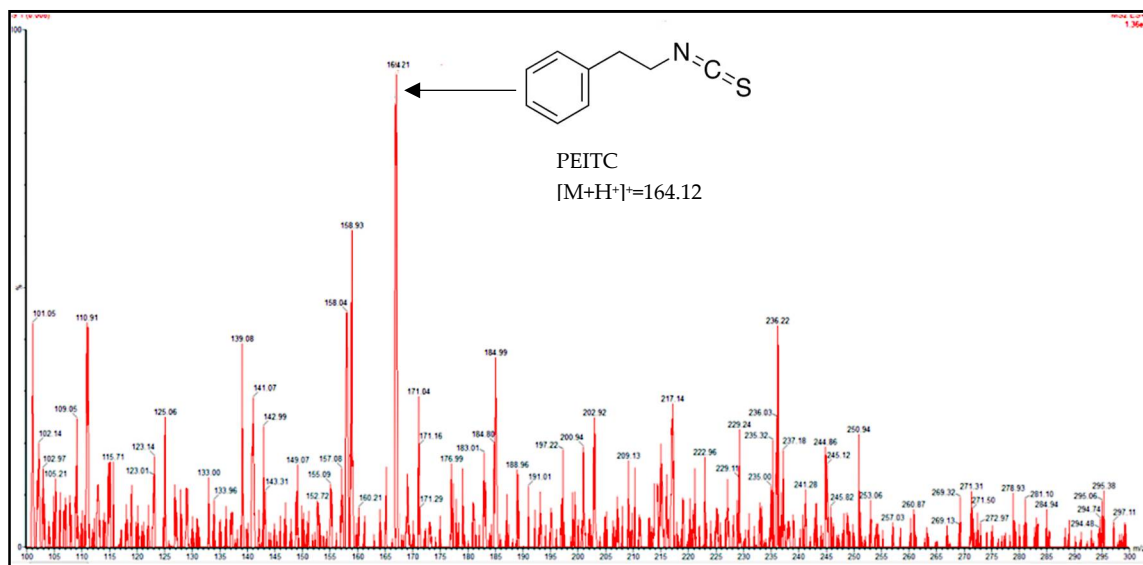

**Figure S1:** A 'Full Scan' chromatogram representative of the hydrolysis of glucosinolates' solution extract, from the edible-watercress sample, prior to extraction with various solvents. The spectrum was recorded via Waters Acquity UPLC system equipped with a triple-quadrupole tandem mass spectrometer (Xevo TQD). PEITC can be detected at  $m/z=164.21$ , in the positive ionization mode.

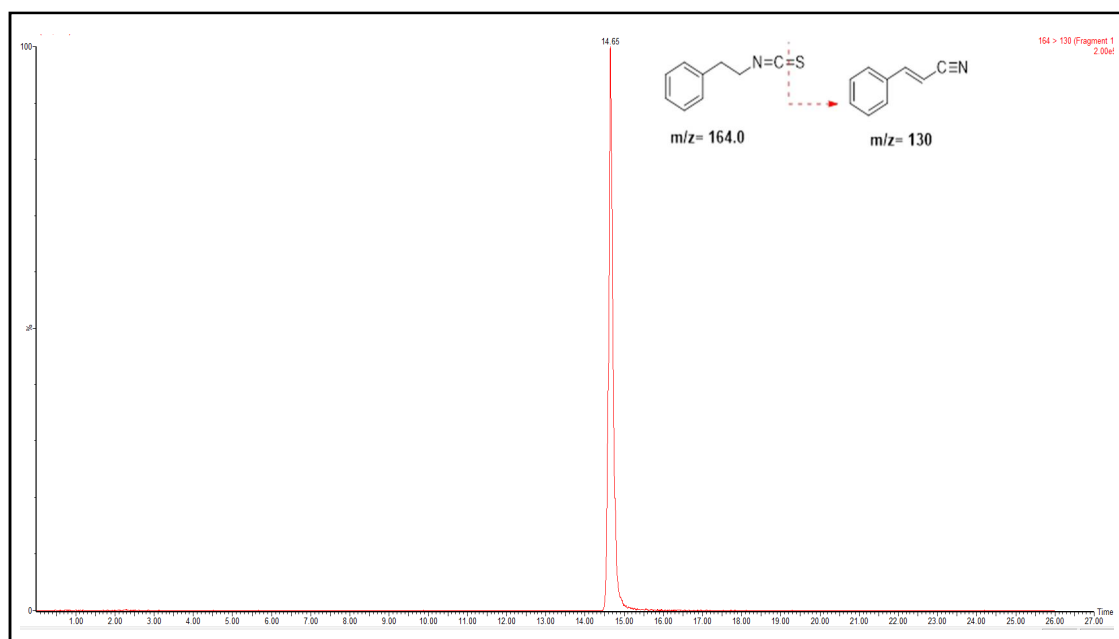

**Figure S2:** Quantification of PEITC content via Multiple Reaction Monitoring (MRM) transitions;  $m/z$  164 $\rightarrow$ 130. The parameters; cone voltage, collision energy,  $m/z$  of product ion as well as dwell were obtained from the Intellistar application of

MassLynx Software when the precursor ion was set at 164.0 Da, in the positive ionization mode.

**Table S1:** Area peak intensity of the calibration curve obtained from different concentrations (2 ppb-100 ppm) of standard PEITC in acetonitrile solution. Each sample was run 3 times and the average value of the area peak intensity was calculated.

| [PEITC]<br>(ppb) | Run-1        | Run-2        | Run-3        | Average      | SD         |
|------------------|--------------|--------------|--------------|--------------|------------|
| 2                | 424.967      | 468.239      | 451.235      | 448.147      | 21.801     |
| 4                | 760.200      | 753.215      | 787.165      | 766.860      | 17.928     |
| 5                | 918.320      | 925.235      | 920.215      | 921.257      | 3.573      |
| 10               | 1750.920     | 1730.258     | 1728.256     | 1736.478     | 12.547     |
| 20               | 3362.120     | 3356.847     | 3340.156     | 3353.041     | 11.466     |
| 50               | 8201.720     | 8163.215     | 8158.326     | 8174.420     | 23.768     |
| 100              | 16524.720    | 16830.000    | 16223.210    | 16525.977    | 303.397    |
| 200              | 32436.720    | 32340.330    | 32756.550    | 32511.200    | 217.877    |
| 500              | 81672.720    | 80668.160    | 80979.340    | 81106.740    | 514.255    |
| 1000             | 161232.700   | 161228.200   | 161235.511   | 161232.137   | 3.688      |
| 2000             | 362352.700   | 402342.100   | 302312.214   | 382347.400   | 28276.776  |
| 5000             | 815712.800   | 805709.300   | 790721.300   | 804047.800   | 12578.323  |
| 10000            | 1611313.000  | 1611309.000  | 1611324.141  | 1611315.380  | 7.846      |
| 100000           | 16435110.012 | 13122110.000 | 13110000.321 | 14222406.778 | 916266.778 |

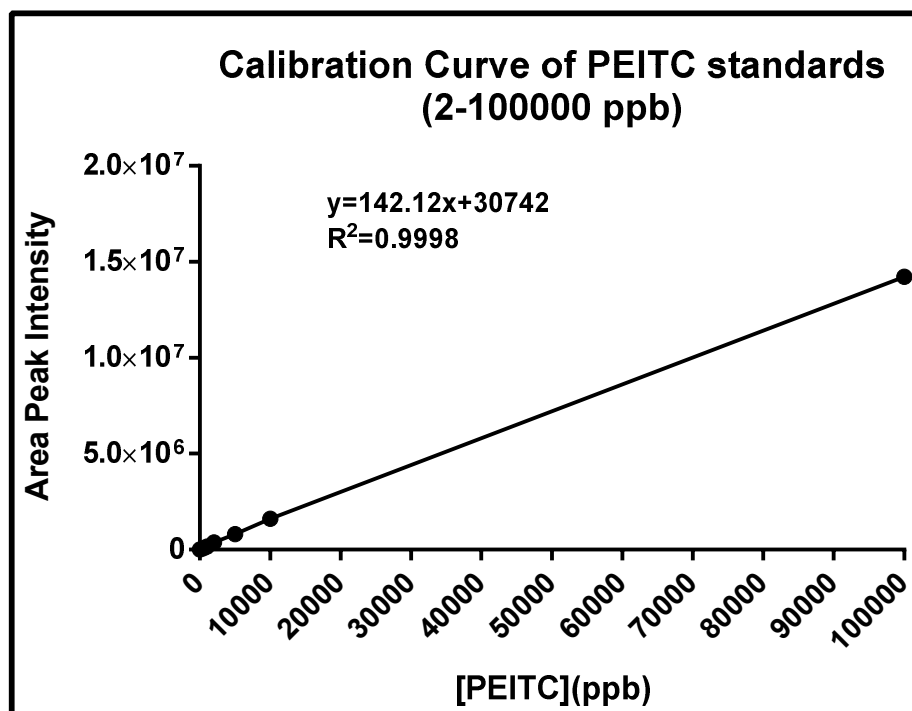

**Figure S3:** Calibration curve of various PEITC concentrations (2 ppb-100 ppm) used for the quantification of total PEITC obtained from both edible and non-edible watercress samples.

|                                    | Fractions     | Run-1    | Run-2    | Run-3    | Average  | SD      |
|------------------------------------|---------------|----------|----------|----------|----------|---------|
| Edible<br>Watercress<br>sample     | Hexane        | 31964.2  | 32013.2  | 31862.01 | 31946.47 | 82.90   |
|                                    | Ethyl Acetate | 31068.92 | 31241.96 | 32095.95 | 31468.94 | 459.92  |
|                                    | Chloroform    | 31086    | 31165.96 | 31881.99 | 31377.98 | 438.30  |
| Non-edible<br>Watercress<br>sample | Hexane        | 30425.21 | 31964.21 | 31972.98 | 31454.02 | 891.08  |
|                                    | Ethyl Acetate | 27785.11 | 31979.21 | 32464.32 | 30742.87 | 2572.96 |
|                                    | Chloroform    | 30735.11 | 30654.09 | 30837.06 | 30742.08 | 91.68   |

**Table S2:** Area peak intensity of three fractions from both edible and non-edible watercress samples. The quantification of total PEITC content was performed from three independent experiments (runs).
